# Supplementary material
Source: PubMed Central journal article supplement (PMC1150840)

**A**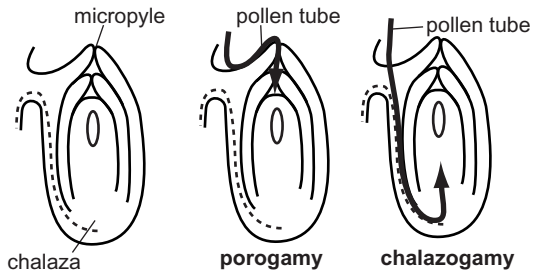**B**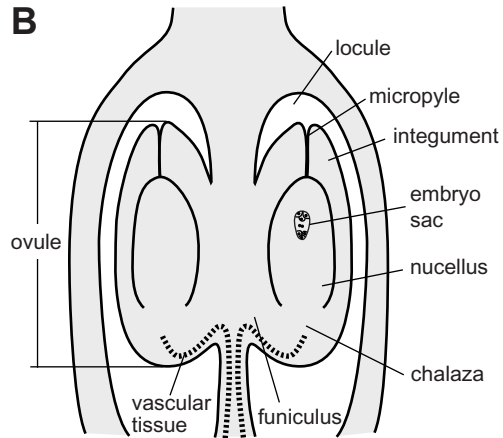**C**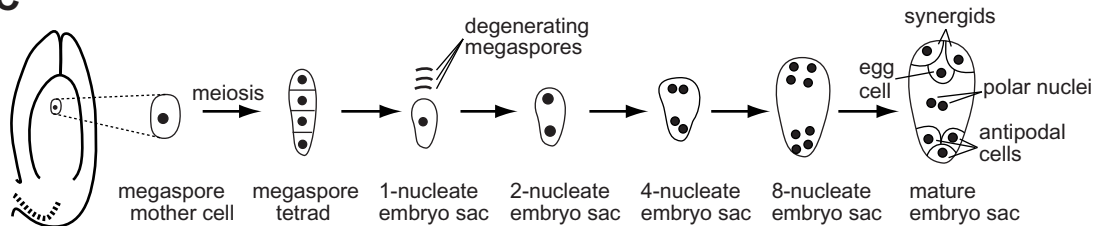

Supplement: pnas_0503081102_1.pdf [file pnas_0503081102_1.pdf]

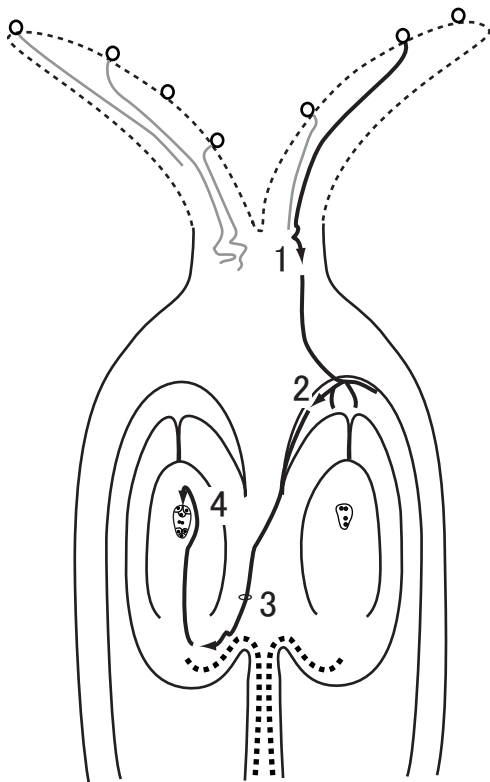

Supplement: pnas_0503081102_2.pdf [file pnas_0503081102_2.pdf]
